1 **Water and temperature stress define the optimal flowering period for wheat in**  
2 **south-eastern Australia**

3

4 **B.M. Flohr**<sup>1,A,3</sup>, J.R. Hunt<sup>2</sup>, J.A. Kirkegaard<sup>1,B</sup>, J.R. Evans<sup>3</sup>

5 <sup>1</sup> CSIRO Agriculture, PO Box 1600, Canberra, ACT, 2600, Australia

6 [A\*\*bonnie.flohr@csiro.au\*\*](mailto:bonnie.flohr@csiro.au), [B\*\*john.kirkegaard@csiro.au\*\*](mailto:john.kirkegaard@csiro.au)

7 <sup>2</sup> La Trobe University, AgriBio Centre for AgriBiosciences, Bundoora, VIC 3086,

8 Australia [j.hunt@latrobe.edu.au](mailto:j.hunt@latrobe.edu.au)

9 <sup>3</sup>The Australian National University, Research School of Biology, Acton, ACT

10 2601, Australia [john.evans@anu.edu.au](mailto:john.evans@anu.edu.au)

11 *Corresponding author:*

12 Bonnie Flohr

13 PO Box 1600

14 Canberra ACT 2600 Australia

15 Ph: 0475982678

16 E: [bonnie.flohr@csiro.au](mailto:bonnie.flohr@csiro.au)

17 *No. of tables:* 4

18 *No. of figures:* 8

19 *No. of supplementary data:* 1

20

21

22

23 **Abstract**

24 Across the Australian wheat belt, the time at which wheat flowers is a critical  
25 determinant of yield. In all environments an optimal flowering period (OFP) exists  
26 which is defined by decreasing frost risk, and increasing water and heat stress.  
27 Despite their critical importance, OFPs have not been comprehensively defined  
28 across south eastern Australia's (SEA) cropping zone using yield estimates  
29 incorporating temperature, radiation and water-stress. In this study, the widely  
30 validated cropping systems model APSIM was used to simulate wheat yield and  
31 flowering date, with reductions in yield applied for frost and heat damage based on  
32 air temperatures during sensitive periods. Simulated crops were sown at weekly  
33 intervals from April 1 to July 15 of each year. The relationship between flowering  
34 date and grain yield was established for 28 locations using 51-years (1963-2013) of  
35 climate records. We defined OFPs as the flowering period which was associated with  
36 a mean yield of  $\geq 95\%$  of maximum yield from the combination of 51 seasons and  
37 16 sowing dates. OFPs for wheat in SEA varied with site and season and were  
38 largely driven by seasonal water supply and demand, with extremes of heat and  
39 temperature having a secondary though auto-correlated effect. Quantifying OFPs  
40 will be a vital first step to identify suitable genotype x sowing date combinations to  
41 maximise yield in different locations, particularly given recent and predicted  
42 regional climate shifts including the decline in autumn rainfall.

43

44 **Keywords:** APSIM, drought, frost, heat, optimal flowering period, simulated yield

45

46

47

48

49

50

51 **1. Introduction**

52 In all environments there exists a period during which wheat (*Triticum aestivum* L.)  
53 must flower in order for grain yield to be maximised, herein referred to as the  
54 optimal flowering period (OFP). Flowering during the optimal period is critical to  
55 grain yield as grain number is determined just prior to and at flowering (Fischer,  
56 1985) and grain yield is most sensitive to stresses during this period, including  
57 drought (del Moral *et al.*, 2003; Giunta *et al.*, 1993) and extreme high (Ferris *et al.*,  
58 1998; Shpiler and Blum, 1990; Tashiro and Wardlaw, 1990) and low temperatures  
59 (Boer *et al.*, 1993; Fuller *et al.*, 2007). In temperate climates such as northern  
60 Europe, flowering date has a broad optimum. However, in environments with a  
61 distinct dry season, flowering outside narrow OFPs can result in drastic yield  
62 reductions (Bodner *et al.*, 2015). The wheat belt of south eastern Australia (SEA) is  
63 one such environment, which has a predominantly Mediterranean climate with a cool  
64 wet season during which rain-fed wheat and other grain crops are grown, and a hot,  
65 dry season where land is left fallow. Whilst rainfall in the north-east of the region is  
66 equi-seasonal in distribution, cropping is still confined to the cool season by high  
67 summer temperatures and insufficient precipitation to sustain summer crops (Chenu  
68 *et al.*, 2013; Potgieter *et al.*, 2002). In the 2012/ 2013 season the south eastern states  
69 of Australia (New South Wales, Victoria and South Australia) produced over 14 Mt  
70 of wheat, 63% of Australia's total wheat production (Commonwealth of Australia,  
71 2013). The majority of annual production is exported, making the region important  
72 for global food security.

73  
74 In SEA, spring wheat cultivars are established following rainfall in April-May  
75 (austral autumn) and grow during winter to mature at the end of spring. Significant  
76 yield progress has been made by breeders selecting cultivars with development  
77 patterns such that once established in autumn they will flower during the optimal  
78 period (Richards, 1991; Richards *et al.*, 2014). However, since 1996, rains that could  
79 once be relied upon by farmers to establish crops in April-May have declined  
80 significantly (Cai *et al.*, 2012; Pook *et al.*, 2009). This decline was particularly  
81 severe during the millennium drought (Verdon-Kidd *et al.*, 2014) at which time  
82 wheat crops established and flowered too late and yield was reduced by terminal  
83 drought and heat (Commonwealth of Australia, 2013). Reduced autumn rainfall has  
84 been attributed to anthropogenic climate change (Cai *et al.*, 2012; Murphy and

85 Timbal, 2008) and is likely to persist. New combinations of management and  
86 genetics will be required to stabilise flowering date in order to overcome the  
87 observed yield decline (Kirkegaard and Hunt, 2010), and maintain the viability of  
88 SEA wheat farms and their contribution to global food security. A clear first step in  
89 this process is to identify the current OFP for environments in the SEA wheat belt.  
90  
91 A combination of environmental factors (precipitation, soil type, temperature)  
92 influence the opening, closing and duration of the OFP. Previous authors have stated  
93 that OFPs in SEA occur after the last spring frost and before the onset of heat and  
94 water stress (Anderson and Smith, 1990; Richards, 1991; Zheng *et al.*, 2012).  
95 Untimely spring frosts (September to October) are common in the Australian wheat  
96 belt (Boer *et al.*, 1993; Fuller *et al.*, 2007; Zheng *et al.*, 2012). A yield penalty of 10  
97 % as a direct result of frost is common (Fuller *et al.*, 2007), and more catastrophic  
98 events are frequent (Crimp *et al.*, 2015). Zheng *et al.* (2015) analysed the frost and  
99 heat patterns of the Australian wheat belt, and found that the only regions that could  
100 be classified as almost “frost free” were some areas of the coastline in South  
101 Australia and north-east of central Queensland, while frosts occurred in other regions  
102 in 80% of years. Wheat is most sensitive to frost during reproductive growth stages.  
103 When wheat ears are exposed to freezing temperature after heading, frost damage  
104 will reduce the number of grain and sometimes cause death of entire ears (Fuller *et*  
105 *al.*, 2007).  
106  
107 High temperatures during sensitive reproductive growth stages can also result in a  
108 yield penalty (Ferris *et al.*, 1998). Gomez-Macpherson and Richards (1995) found  
109 that grain yield declined by 1.3% per day that sowing was delayed after late-May  
110 due to high temperatures around the time of anthesis and grain-fill. High temperature  
111 events (>35°C) during the period between head emergence to 10 days after anthesis  
112 can significantly reduce grain number and quality (Tashiro & Wardlaw, 1990).  
113 Similarly, heat shock during the grain filling period can also cause grain abortion and  
114 degrade grain quality (Randall and Moss, 1990; Stone and Nicolas, 1995).  
115  
116 Perhaps the most important determinant of the OFP is the pattern of water supply  
117 and demand experienced in a given environment (Bodner *et al.*, 2015). Whilst  
118 drought patterns in SEA are well described (Chenu *et al.*, 2013), the effect of

119 seasonal water supply and demand in determining OFPs has been overlooked in  
120 previous analyses of OFPs e.g. Zheng *et al.* (2012), Zheng *et al.* (2013), Bell *et al.*  
121 (2015). In all of these studies OFPs were defined only by temperature extremes,  
122 which ignores the critical role that water supply and demand plays in defining OFPs  
123 in SEA.

124

125 To obtain an accurate definition of the OFP for a specific environment, Anderson  
126 and Smith (1990) suggest that time of sowing experiments should be conducted over  
127 a range of seasons. Anderson *et al.* (1996) defined the optimal flowering period from  
128 field experiments by "...using the mean flowering dates ...of the sites and the  
129 optimum flowering period was taken to be 10 days either side of the mean optimum  
130 date [for grain yield]". Experiments like these are expensive, and the  
131 recommendations to farmers are specific to the experimental conditions (e.g.  
132 temperature, rainfall and soil water holding capacity) during the period of the  
133 experiments, and may not reflect long-term climatic patterns (Asseng *et al.*, 2001).  
134 More recently, Zheng (2012) analysed heat and frost patterns of the wheat belt to  
135 calculate flowering windows based on occurrence of last frost days and first heat  
136 days.

137 Alternatively, an analysis of historic climate records using a crop simulator such as  
138 APSIM (Holzworth *et al.*, 2014; Keating *et al.*, 2003) allows one to identify  
139 management strategies to achieve optimum sowing date and flowering period  
140 (Asseng *et al.*, 2001; Zheng *et al.*, 2012) and can account for both temperature and  
141 water stress simultaneously. This is especially useful in the seasonally variable  
142 production environments of SEA (Asseng and Pannell, 2013; Asseng *et al.*, 2001;  
143 Turner, 2004).

144 This study sought to define OFPs in SEA to assess management and genetic  
145 interventions to overcome yield reductions due to the decline in autumn rainfall. It  
146 uses APSIM to incorporate the seasonal effects of water supply and demand,  
147 radiation and temperature on grain yield. By using the potential yield predictions to  
148 integrate the effects of temperature and radiation as well as water supply and  
149 demand, it extends the work of Zheng *et al.* (2012) who used only air temperature  
150 records alone (i.e. frost, heat) to define OFPs for the entire Australian wheat belt.

151 **2. Materials and Methods**

152 *2.1 Site selection and crop simulation approach*

153 Locations were selected to represent environments where wheat is grown in the  
154 cropping belt of SEA (Fig. 1, Table 1), and based on the availability of accurate soil  
155 characterization from the APSOil database (Dalglish *et al.*, 2009) and patched-point  
156 meteorological weather stations from the SILO database (Jeffrey *et al.*, 2001). At  
157 some sites (Hopetoun, Swan Hill and Bogan Gate), two different soil files were  
158 selected to compare the effect of soil type on the OFP. The cropping systems model  
159 Agricultural Production Systems SIMulator (APSIM), version 7.6 (Holzworth *et al.*,  
160 2014; Keating *et al.*, 2003) was used to simulate wheat flowering date and yield  
161 using 51 years (1963- 2013) of climate data. Simulation of wheat growth,  
162 development and yield in APSIM has been extensively validated in numerous studies  
163 across southern Australia (Asseng *et al.*, 2001; Carberry *et al.*, 2009; Hochman *et al.*,  
164 2009; Lilley *et al.*, 2003; Lilley and Kirkegaard, 2007), and no further validation was  
165 undertaken here. The key APSIM modules used in the analysis were Wheat (wheat  
166 crop growth and development) and Manager (specifying sowing rules).

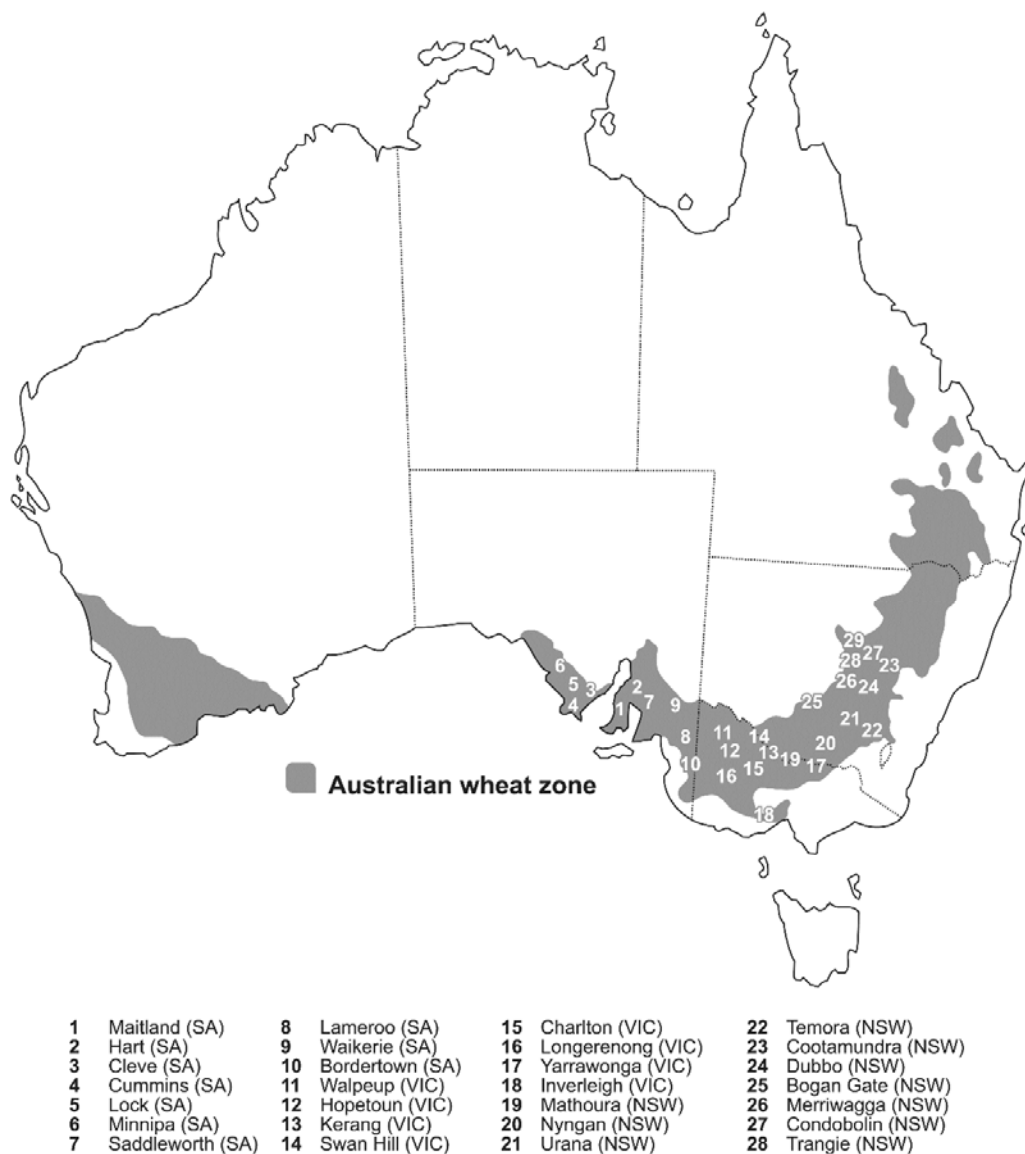

167  
168 **Figure 1:** Dry-land cereal-cropping areas in Australia (shaded) and the locations  
169 used for this study.

170

171

172

173

174

**Table 1:** The 28 locations, where (a) and (b) refer to different soil types at the same location, used in the study and corresponding long-term mean annual rainfall, patch point dataset (PPD) station number, APSOil file number used in the simulation study.

| State |    | Location    | Latitude,<br>Longitude | Mean<br>annual<br>rainfall | PPD station No. | APSOil File<br>no. |
|-------|----|-------------|------------------------|----------------------------|-----------------|--------------------|
| SA    | 1  | Maitland    | -34.3745,<br>137.6733  | 502                        | 22008           | 261                |
|       | 2  | Hart        | -33.7322,<br>138.4922  | 458                        | 21000           | 286                |
|       | 3  | Cleve       | -33.7011,<br>136.4937  | 400                        | 18014           | 316                |
|       | 4  | Cummins     | -34.2644,<br>135.7266  | 428                        | 18023           | 37                 |
|       | 5  | Lock        | -33.5676,<br>135.7561  | 390                        | 18046           | 318                |
|       | 6  | Minnipa     | -32.8542,<br>135.1542  | 343                        | 18053           | 352                |
|       | 7  | Saddleworth | -34.0844,<br>138.7815  | 493                        | 23315           | 104                |
|       | 8  | Lameroo     | -35.3288,<br>140.5175  | 385                        | 25509           | 253                |
|       | 9  | Waikerie    | -34.1778,<br>139.9806  | 258                        | 24018           | 104                |
|       | 10 | Bordertown  | -36.3125,<br>140.7718  | 479                        | 25501           | 344                |
| Vic   | 11 | Walpeup     | -35.1201,<br>142.0041  | 331                        | 76064           | 726                |
|       | 12 | Hopetoun(a) | -35.7344,<br>142.3703  | 342                        | 77018           | 716                |
|       | 12 | Hopetoun(b) | -35.7344,<br>142.3703  | 342                        | 77018           | 714                |



|     |    |               |                       |     |       |     |
|-----|----|---------------|-----------------------|-----|-------|-----|
|     | 13 | Kerang        | -35.8674,<br>143.8007 | 356 | 80024 | 733 |
|     | 14 | Swan Hill(a)  | -35.3406,<br>143.5533 | 344 | 77042 | 718 |
|     | 14 | Swan Hill(b)  | -35.3406,<br>143.5533 | 344 | 77042 | 719 |
|     | 15 | Charlton      | -36.2715,<br>143.345  | 403 | 80067 | 736 |
|     | 16 | Longerenong   | -36.6722,<br>142.2991 | 413 | 79028 | 746 |
|     | 17 | Yarrawonga    | -36.0281,<br>146.0044 | 509 | 81057 | 208 |
|     | 18 | Inverleigh    | -38.243,<br>143.9887  | 553 | 90167 | 737 |
| NSW | 19 | Mathoura      | -35.7228,<br>144.7865 | 360 | 74129 | 203 |
|     | 20 | Nyngan        | -31.5495,<br>147.1961 | 441 | 51039 | 246 |
|     | 21 | Urana         | -35.3305,<br>146.2652 | 441 | 74110 | 212 |
|     | 22 | Temora        | -34.4061,<br>147.5248 | 510 | 73038 | 179 |
|     | 23 | Cootamundra   | -34.6299,<br>148.0364 | 618 | 73142 | 180 |
|     | 24 | Dubbo         | -32.2385,<br>148.6089 | 591 | 65012 | 197 |
|     | 25 | Bogan Gate(a) | -33.1074,<br>147.8008 | 495 | 50004 | 188 |
|     | 25 | Bogan Gate(b) | -33.1074,<br>147.8008 | 495 | 50004 | 189 |
|     | 26 | Merriwagga    | -33.9247,<br>145.5205 | 356 | 75142 | 697 |
|     | 27 | Condobolin    | -33.0664,<br>145.5205 | 437 | 50052 | 688 |

---

|    |         |                       |     |       |     |
|----|---------|-----------------------|-----|-------|-----|
|    |         | 147.2283              |     |       |     |
| 28 | Trangie | -31.9861,<br>147.9489 | 492 | 51049 | 683 |

175

176

177

178

179

180

181

182

183

184

185

186

187

188

189

190

191

192

193

194

195 APSIM calculates flowering date i.e. anthesis (and other crop stages) by  
196 accumulation of thermal time. In the APSIM plant module, thermal time is  
197 calculated from the average of 3-hourly air temperatures estimated using diurnal  
198 cycling between recorded maximum and minimum temperatures, with the eight 3-  
199 hour estimates averaged to determine the daily value of thermal time for the day. The  
200 length of each crop stage between emergence and floral initiation is determined by  
201 the accumulation of thermal time, and cultivar- specific factors accounting for  
202 vernalisation and photoperiod responses (Ritchie and NeSmith, 1991). The length of  
203 each crop stage from floral initiation to maturity is determined only by accumulation  
204 of thermal time. The root-mean-square error (RMSE) in the ability for APSIM-  
205 Wheat to predict flowering time is 6.2 days (Zheng *et al.*, 2013).

## 206 *2.2 Crop management set up*

207 All simulated crops were sown at 150 plants/m<sup>2</sup>, at a depth of 30 mm with a row  
208 spacing of 300 mm. In APSIM cultivars are allocated a vernalisation and  
209 photoperiod “factor” which represent sensitivity to environment elements cold and  
210 day length where high values are more sensitive. The model then uses these factors  
211 to calculate cultivar specific developmental rates. The cultivar parameters selected  
212 here represent a spring wheat of mid to fast phenological development, typical of  
213 varieties grown in SEA (e.g. Scout, Spitfire, Mace etc.). This was based on the  
214 APSIM base cultivar with vernalisation sensitivity of 1.5 and photoperiod sensitivity  
215 of 3.0. For comparison, a winter wheat (e.g. Wedgetail) with vernalisation sensitivity  
216 of 4, photoperiod sensitivity of 0, and an intermediate facultative wheat (e.g.  
217 Eaglehawk) with a vernalisation sensitivity of 2.5 and photoperiod sensitivity of 4  
218 were also simulated at selected sites (Temora, NSW and Lameroo, S.A) under the  
219 same management parameters to observe any change in yield and OFP.

220 APSIM-Manager was used to sow a crop on a fixed date at weekly intervals from 1  
221 April to 15 July of each year. Nitrogen was applied as NO<sub>3</sub> with a fertilizer rule,  
222 which was maintained above 100 kg/ha in the top three layers of the soil throughout  
223 the season such that nitrogen supply did not limit yield. In the simulation, the initial  
224 plant available water was set to 0 mm, and the crop received 15 mm of irrigation at  
225 sowing to ensure that it would emerge shortly after it was sown. APSIM assumes  
226 crops are grown free of weeds and disease. As highlighted in the recent review by

227 Barlow *et al.* (2015), APSIM does not currently account for frost and heat events in  
228 its yield predictions. Therefore, a reduction for frost and heat damage based on air  
229 temperature obtained from patched point meteorological weather stations was  
230 applied as per Bell *et al.* (2015). To estimate the effect of heat or frost stress events  
231 on grain yield during sensitive growth stages, temperature ranges were categorized  
232 into mild, medium and severe stress with a corresponding impact on yield during  
233 different growth stages, these estimations are based on the literature and expert  
234 opinion (Bell *et al.*, 2015) (Table 2). Yield reductions were cumulative for multiple  
235 events that occurred during the sensitive stages of plant growth (Table 2). The  
236 combination of management rules and frost and heat rules ensure that the OFP was  
237 defined for each environment by the combination the drought pattern, temperature  
238 and radiation. Outputs from the simulation were annual potential grain yield and  
239 annual grain yield modified for frost and heat damage, referred to as the frost and  
240 heat limited (FHL) yield hereafter, at different sowing dates and corresponding  
241 flowering dates. To quantify the effect of stress on the OFP, the mean stress index of  
242 frost and heat, and the mean water stress between floral initiation and maturity  
243 applied to the crop was plotted for selected sites, with 0 indicating zero effect on  
244 grain yield, and 1 having the greatest effect on grain yield.

245 **Table 2:** Temperature criteria for frost and heat stress during sensitive Zadoks  
246 growth stages and corresponding estimated yield reduction, from Bell *et al.* (2015).  
247 Yield reduction was calculated for each day and multiplied, so that increasing  
248 numbers of stress events results in cumulative reduction in yield.

| Temperature             | Stress level | Zadoks sensitive stage | Yield reduction per day |
|-------------------------|--------------|------------------------|-------------------------|
| 0 to 2 <sup>0</sup> C   | Mild         | 60-69                  | 10%                     |
| -2 to 0 <sup>0</sup> C  | Moderate     | 60-75                  | 20%                     |
| < -2 <sup>0</sup> C     | Severe       | 60-79                  | 90%                     |
| 32 to 34 <sup>0</sup> C | Mild         | 60-79                  | 10%                     |
| 34 to 36 <sup>0</sup> C | Moderate     | 60-79                  | 20%                     |
| >36 <sup>0</sup> C      | Severe       | 60-79                  | 30%                     |

249

250 For each location, over the 51 years x 16 sowing dates of simulation, the FHL yield  
251 was attributed to the predicted flowering date in each simulation. OFPs were defined

252 by calculating a 15-day running mean of FHL yield over the 51 years of simulation.  
253 Flowering dates corresponding to  $\geq 95\%$  of the peak mean FHL yield defined the  
254 dates of the OFP for each location. Three lines were plotted, the 15-day running  
255 mean, the positive standard deviation, and the negative standard deviation associated  
256 with the running mean. To demonstrate how the OFP changes from season to season,  
257 the 15-day running mean of yield was split into 10, 20, 30, 40, 50, 60, 70, 80 and 90<sup>th</sup>  
258 percentiles for selected locations.

259 The APSIM simulation was also used to estimate the optimal sowing date range for  
260 each location to achieve the OFPs. To define the sowing range, the sowing dates that  
261 corresponded to the flowering dates that achieved the highest 15-day running mean  
262 yield were split into earliest sowing date, 25<sup>th</sup> percentile, median, 75<sup>th</sup> percentile and  
263 latest sowing dates.

264 To observe effects of recent rainfall decline and increasing temperatures within the  
265 51-year simulation, APSIM output for yield and flowering date was analysed for two  
266 time periods 1963-1997 and 1998-2013. The 15-year time period (1998-2013)  
267 includes the period of April-May rainfall decline experienced at many of the sites in  
268 the south-eastern wheat belt described by Cai *et al.* (2012).

269

270

271

272

273

274

275

276

277

278

279

280 **3. Results**

281 *3.1 Defining optimal flowering periods*

282 Yield and OFP varied across 28 locations according to the temperature, radiation and  
283 rainfall patterns and soil type of each environment (Table 3). The highest peak mean  
284 FHL yield was in Maitland (4910 kg ha<sup>-1</sup>), followed by Inverleigh (4841 kg ha<sup>-1</sup>).  
285 The lowest yielding location was Waikerie (1819 kg ha<sup>-1</sup>). The open and close dates  
286 and duration varied significantly across the wheat belt. The earliest OFP open date  
287 was at Minnipa (22 August), while the latest was at Inverleigh (12 October). The  
288 longest and shortest durations of the OFP were Inverleigh (26 days) and Nyngan (4  
289 days), and the latest and earliest close dates were Inverleigh (6 November) and  
290 Nyngan and Waikerie (29 August). Timing of the OFP was related to mean annual  
291 rainfall (Fig. 2) and consequently yield. For example, Inverleigh had a mean annual  
292 rainfall of 553 mm, and an OFP from 12 October to 6 November. In contrast,  
293 Waikerie had a mean annual rainfall of 258 mm and an earlier OFP from 23 August  
294 to the 29 August. However, high annual rainfall often coincided with a cooler  
295 growing season in SEA (data not shown) e.g. Inverleigh, so effects of temperature  
296 and water availability are confounded.

297

298

299

300

301

302

303

304

305

306

307

**Table 3:** Optimal flowering periods (OFPs), peak mean of frost and heat limited yield ( $\text{kg ha}^{-1}$ ) and corresponding flowering date and sowing date range for a mid-fast cultivar over 51-years (1963-2013), for the 28 locations where (a) and (b) refer to different soil types at the same location, ranked in alphabetical order.

| Location       | Optimal flowering period |        | Peak mean yield ( $\text{kg ha}^{-1}$ ) and corresponding flowering date | Sowing date range for corresponding peak mean |                             |        |                             |        |        |
|----------------|--------------------------|--------|--------------------------------------------------------------------------|-----------------------------------------------|-----------------------------|--------|-----------------------------|--------|--------|
|                | Open                     | Close  |                                                                          | Earliest                                      | 25 <sup>th</sup> percentile | Median | 75 <sup>th</sup> percentile | Latest |        |
| Bogan Gate (a) | 19-Sep                   | 3-Oct  | 4283                                                                     | 27-Sep                                        | 12-May                      | 16-May | 21-May                      | 27-May | 1-Jun  |
| Bogan Gate (b) | 18-Sep                   | 1-Oct  | 3650                                                                     | 21-Sep                                        | 6-May                       | 8-May  | 13-May                      | 17-May | 21-May |
| Bordertown     | 26-Sep                   | 15-Oct | 3577                                                                     | 7-Oct                                         | 16-May                      | 23-May | 29-May                      | 3-Jun  | 9-Jun  |
| Charlton       | 21-Sep                   | 30-Sep | 2920                                                                     | 23-Sep                                        | 29-Apr                      | 6-May  | 7-May                       | 10-May | 14-May |
| Cleve          | 7-Sep                    | 18-Sep | 3402                                                                     | 13-Sep                                        | 13-May                      | 15-May | 20-May                      | 24-May | 30-May |
| Condobolin     | 11-Sep                   | 19-Sep | 2435                                                                     | 15-Sep                                        | 29-Apr                      | 2-May  | 7-May                       | 10-May | 15-May |
| Cootamundra    | 6-Oct                    | 20-Oct | 4338                                                                     | 12-Oct                                        | 6-May                       | 13-May | 20-May                      | 24-May | 31-May |
| Cummins        | 8-Sep                    | 28-Sep | 3843                                                                     | 18-Sep                                        | 15-May                      | 19-May | 24-May                      | 27-May | 1-Jun  |
| Dubbo          | 15-Sep                   | 22-Sep | 3881                                                                     | 18-Sep                                        | 6-May                       | 7-May  | 11-May                      | 15-May | 18-May |
| Hart           | 21-Sep                   | 2-Oct  | 4242                                                                     | 24-Sep                                        | 6-May                       | 8-May  | 13-May                      | 18-May | 22-May |
| Hopetoun (a)   | 7-Sep                    | 11-Sep | 2900                                                                     | 8-Sep                                         | 1-May                       | 5-May  | 10-May                      | 14-May | 19-May |
| Hopetoun (b)   | 4-Sep                    | 9-Sep  | 1903                                                                     | 5-Sep                                         | 20-Apr                      | 22-Apr | 25-Apr                      | 29-Apr | 30-Apr |
| Inverleigh     | 12-Oct                   | 6-Nov  | 4841                                                                     | 22-Oct                                        | 2-Jun                       | 11-Jun | 15-Jun                      | 24-Jun | 1-Jul  |
| Kerang         | 12-Sep                   | 18-Sep | 3131                                                                     | 15-Sep                                        | 25-Apr                      | 29-Apr | 3-May                       | 5-May  | 9-May  |
| Lameroo        | 28-Aug                   | 20-Sep | 3154                                                                     | 7-Sep                                         | 26-Apr                      | 29-Apr | 2-May                       | 6-May  | 11-May |
| Lock           | 4-Sep                    | 14-Sep | 3049                                                                     | 9-Sep                                         | 6-May                       | 7-May  | 13-May                      | 15-May | 20-May |
| Longerenong    | 6-Oct                    | 10-Oct | 2749                                                                     | 7-Oct                                         | 9-May                       | 12-May | 16-May                      | 25-May | 27-May |
| Maitland       | 16-Sep                   | 9-Oct  | 4910                                                                     | 1-Oct                                         | 27-May                      | 29-May | 5-Jun                       | 10-Jun | 14-Jun |
| Mathoura       | 15-Sep                   | 22-Sep | 2268                                                                     | 18-Sep                                        | 26-Apr                      | 30-Apr | 3-May                       | 6-May  | 9-May  |
| Merriwagga     | 27-Aug                   | 10-Sep | 2619                                                                     | 31-Aug                                        | 22-Apr                      | 25-Apr | 27-Apr                      | 29-Apr | 6-May  |
| Minnipa        | 22-Aug                   | 8-Sep  | 3514                                                                     | 25-Aug                                        | 29-Apr                      | 30-Apr | 6-May                       | 6-May  | 8-May  |
| Nyngan         | 26-Aug                   | 29-Aug | 2234                                                                     | 27-Aug                                        | 27-Apr                      | 30-Apr | 2-May                       | 7-May  | 9-May  |
| Saddleworth    | 9-Sep                    | 24-Sep | 3857                                                                     | 17-Sep                                        | 6-May                       | 10-May | 15-May                      | 17-May | 23-May |
| Swan Hill (a)  | 1-Sep                    | 20-Sep | 3673                                                                     | 15-Sep                                        | 26-Apr                      | 2-May  | 6-May                       | 9-May  | 12-May |
| Swan Hill (b)  | 1-Sep                    | 10-Sep | 2805                                                                     | 5-Sep                                         | 19-Apr                      | 24-Apr | 27-Apr                      | 30-Apr | 3-May  |
| Temora         | 25-Sep                   | 10-Oct | 3038                                                                     | 3-Oct                                         | 4-May                       | 6-May  | 13-May                      | 18-May | 22-May |
| Trangie        | 12-Sep                   | 30-Sep | 4746                                                                     | 22-Sep                                        | 13-May                      | 14-May | 21-May                      | 25-May | 30-May |
| Urana          | 18-Sep                   | 29-Sep | 3282                                                                     | 23-Sep                                        | 30-Apr                      | 4-May  | 8-May                       | 12-May | 16-May |
| Waikerie       | 23-Aug                   | 29-Aug | 1819                                                                     | 25-Aug                                        | 22-Apr                      | 23-Apr | 27-Apr                      | 29-Apr | 3-May  |
| Walpeup        | 8-Sep                    | 17-Sep | 3318                                                                     | 11-Sep                                        | 29-Apr                      | 1-May  | 4-May                       | 10-May | 13-May |
| Yarrawonga     | 25-Sep                   | 2-Oct  | 3594                                                                     | 28-Sep                                        | 30-Apr                      | 2-May  | 8-May                       | 13-May | 17-May |

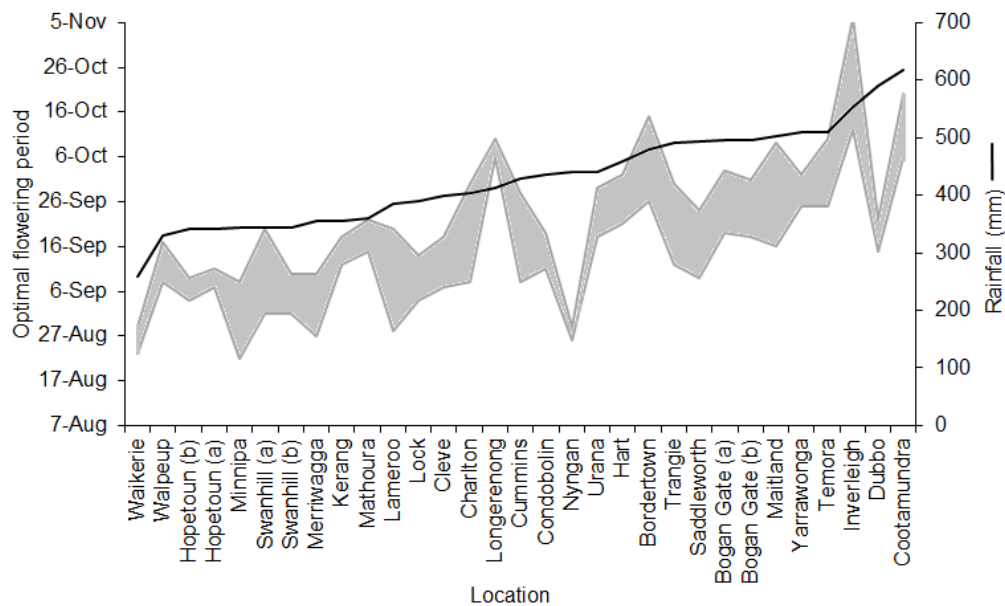

**Figure 2:** The relationship between optimal flowering period (shaded grey) of a mid-fast cultivar of wheat (Table 3), and mean annual rainfall (mm) (line) (Table 2) for 28 locations, where (a) and (b) refer to different soil types at the same location.

308

309

310

311

312

313

314

315

316

317

318

319



320 10<sup>th</sup>- 90<sup>th</sup> percentiles of FHL yield simulated at each flowering date (Fig. 3) reveal  
321 the seasonal variability in the OFP. Depending on which environment factor had the  
322 greatest effect on yield at each location i.e. frost, radiation, heat or drought, the OFP  
323 shifted accordingly. At some locations, e.g. Lameroo (Fig. 3A), in low yielding  
324 seasons the OFP was earlier than in more favourable seasons, as early flowering  
325 allowed crops to escape spring drought. At other locations with high incidence of  
326 frost, e.g. Temora (Fig. 3B), the OFP was later in less favourable seasons, as later  
327 flowering allowed crops to escape frost. Higher yielding seasons also had a broader  
328 optimal period, and in the cases above largely overlapped with the optima in lower  
329 yielding seasons. In a practical sense, given seasonal conditions are unknown at  
330 sowing, wheat producers should aim to have crops flowering in the period bounded  
331 by 95% of the maximum yield achieved (Table 3).

332

333

334

335

336

337

338

339

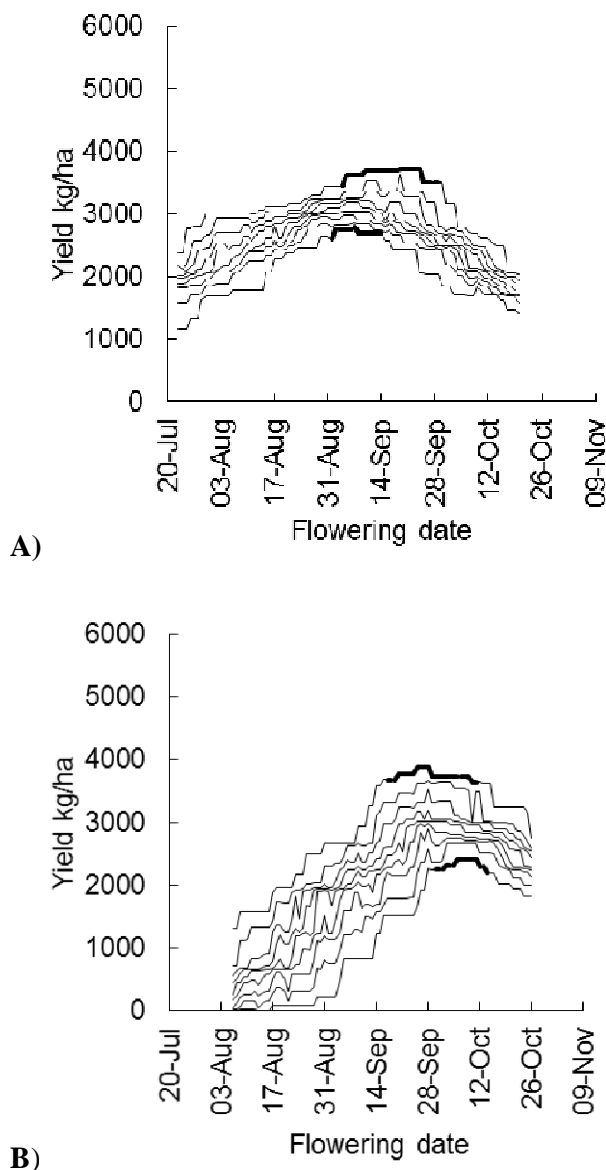

**Figure 3:** The relationship between frost and heat limited (FHL) yield ( $\text{kg ha}^{-1}$ ) and flowering date for a mid-fast cultivar of wheat at A) Lameroo, SA and B) Temora, NSW split into percentiles. Lines represent the simulated 10<sup>th</sup>, 20<sup>th</sup>, 30<sup>th</sup>, 40<sup>th</sup>, 50<sup>th</sup>, 60<sup>th</sup>, 70<sup>th</sup>, 80<sup>th</sup> and 90<sup>th</sup> percentiles of yield and corresponding flowering date values generated from 16 sowing dates over 51-years (1963-2013). Darkened line is the optimum flowering period for the 10<sup>th</sup> and 90<sup>th</sup> percentiles defined by  $\geq 95\%$  of the maximum mean yield.

340

341

342 Figure 4 shows how OFP have been defined using FHL yield. Figure 4 shows just 6  
343 diverse locations, the same figures for all 28 locations can be found in  
344 Supplementary Figure 1. The degree of the incline or decline of the curves before or  
345 after the optimum for a location illustrates the influence of sub-optimal radiation  
346 and/or frost (before optimum), or accelerated development and/or drought and/or  
347 heat on grain yield (after optimum). For example, Minnipa (Fig. 4B) curves have a  
348 gentle incline showing that radiation and frost are less of a determinant on OFP, but  
349 the sharper decline after the optima shows heat and water stress play a larger role  
350 after peak yield is reached. In comparison, in locations such as Inverleigh and Dubbo  
351 (Fig. 4D and 4F), frost or sub-optimal radiation are greater determinants of the OFP,  
352 as seen by the sharp incline of the curves. The positive and negative standard  
353 deviation lines in Figure 4 show the variation around the mean, and reflect seasonal  
354 variability and the stability of a location's environment.

355 In this analysis we compared two different soils at three locations; Swan Hill,  
356 Hopetoun and Bogan Gate (Table 1). In each instance, there was a heavier textured  
357 soil with higher plant available water capacity (PAWC), and a soil with a lower  
358 PAWC. At Swan Hill the OFP for the lighter soil (APSoil file 719) was 10 days  
359 shorter than for the heavier soil (APSoil file 718) (Table 3). In Hopetoun, the  
360 flowering period for the lighter soil began 3 days later but was of similar duration as  
361 that of the heavier soil (5 and 6 days respectively) (Table 3). The flowering period  
362 for the two soils at Bogan Gate were very similar (Table 3). There was some  
363 indication that OFP on low PAWC soils were earlier than for higher PAWC soils,  
364 presumably because higher PAWC soils were more able to buffer against terminal  
365 drought.

366

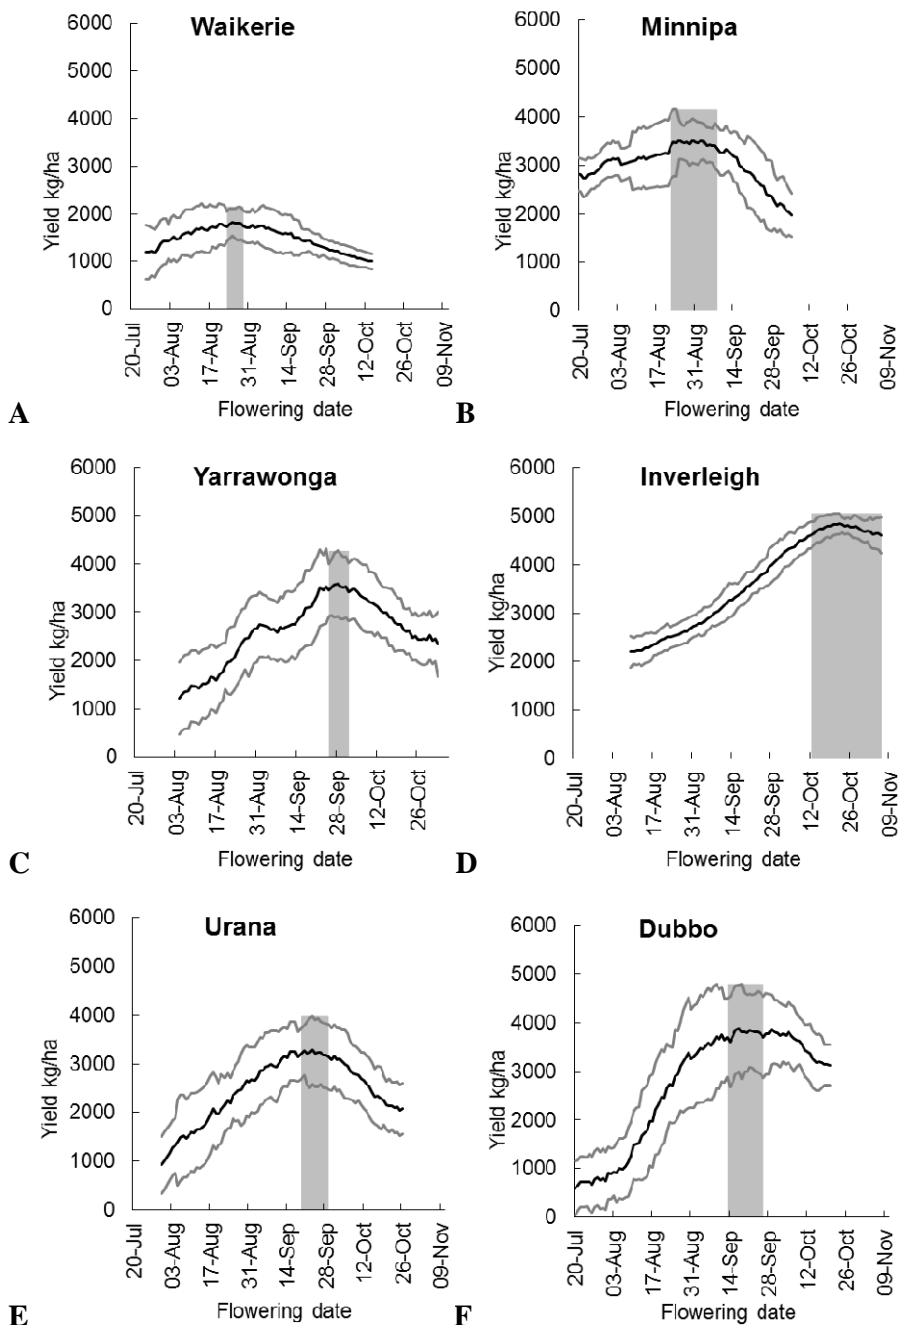

**Figure 4:** The optimal flowering period (OFP) for a mid-fast cultivar of wheat determined by APSIM simulation for A) Waikerie, SA B) Minnipa, SA C) Yarrawonga, VIC D) Inverleigh, VIC E) Urana, NSW F) Dubbo, NSW. Black lines represent the frost and heat limited (FHL) 15-day running mean yield ( $\text{kg ha}^{-1}$ ). Grey lines represent the standard deviation of the FHL mean yield ( $\text{kg ha}^{-1}$ ). Grey columns are the estimated OFP defined as  $\geq 95\%$  of the maximum mean yield achieved from

the 51 seasons (1963-2013). All locations shown as in Figure 4 are located in Supplementary Figure 1.

367 *3.2 Relative importance of temperature extremes (frost and heat) and water stress in*  
368 *determining OFP*

369 The OFP which has been defined for wheat in Figure 4 represents the combined  
370 effect of frost, heat and water stress and radiation on wheat physiological processes  
371 and yield. Figure 5 shows three of these sites again, but provides greater detail on  
372 how the OFP moves in response to these stresses, and how by using APSIM yield in  
373 addition to heat and frost rules gives a more accurate definition of the OFP,  
374 compared to using temperature extremes alone.

375 Figure 5A for Waikerie demonstrates how using extreme temperatures alone to  
376 calculate OFP can result in severe overestimates in the timing of its occurrence. The  
377 point at which heat and frost damage lines intersect (where combined damage is  
378 lowest), is 8 September, however the flowering date for peak FHL yield is 25  
379 August, 14 days earlier. The peak potential yield (APSIM without frost and heat  
380 damage) is earlier again, at 9 August. At Temora and Longerenong there is a similar  
381 pattern, although the shifts were less extreme (Fig. 5B, 5C). At Temora the intercept  
382 of the frost and heat indices is the 9 October, but the peak FHL yield is achieved  
383 from a flowering date on 28 September. Without applying the heat and frost indices,  
384 the peak potential yield was achieved by flowering on the 5 September. At  
385 Longerenong, the intercept of the frost and heat index is 15 October, but the peak  
386 FHL yield and peak potential yield is achieved from a flowering date on 7 October.  
387 In all of these Figures the effect of water stress during the reproductive phase in  
388 defining OFP is clear. Although only three examples are shown, similar patterns are  
389 observed at other sites included in this study. These examples clearly demonstrate  
390 that integration of both extreme temperatures and radiation, as well as water supply  
391 and demand as per our method are essential for accurate definition of OFPs.

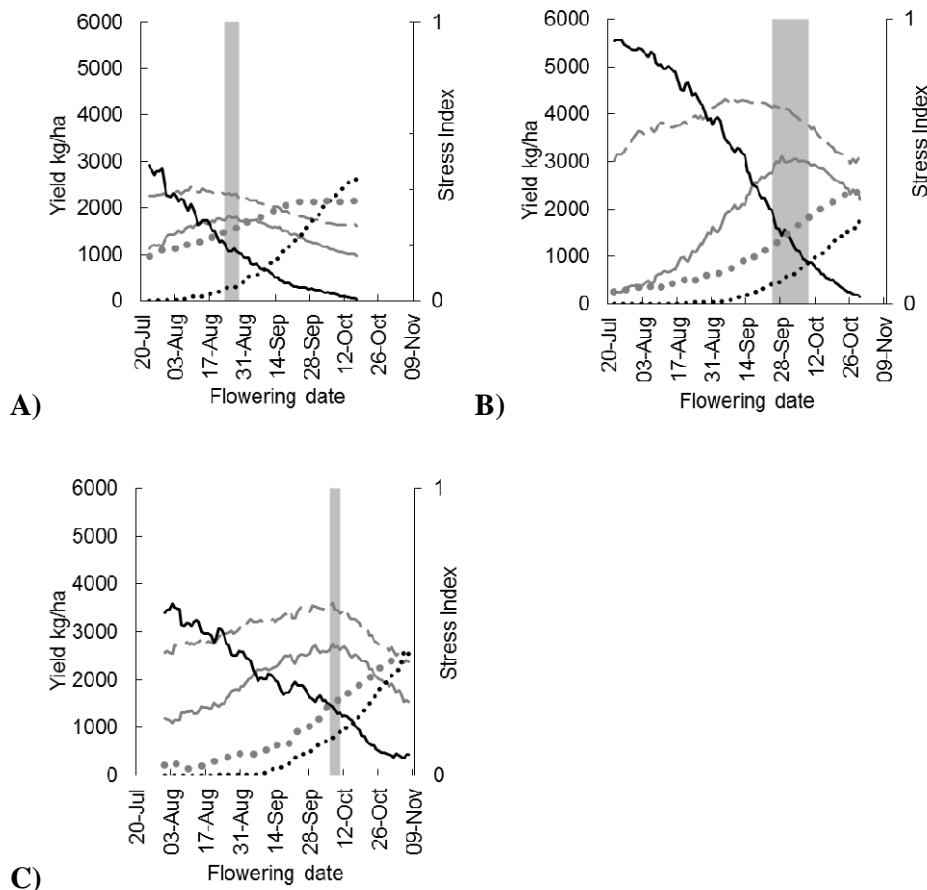

**Figure 5:** Potential yield ( $\text{kg ha}^{-1}$ ) (broken grey line), frost and heat limited yield ( $\text{kg ha}^{-1}$ ) (solid grey line) and the mean heat (dotted black line), frost (solid black line) and mean water stress from floral initiation to maturity (dotted grey line) indices (0 to 1) applied to yield plotted against flowering date for a mid-fast cultivar of wheat. A) Waikerie, SA B) Temora, NSW C) Longerenong, Vic. Grey columns are the estimated optimal flowering period defined as  $\geq 95\%$  of the maximum mean yield achieved in the 51 seasons (1963-2013).

### 3. 3 Implications for sowing time and genotype

392 Figure 6 and Table 4 illustrate that OFP for mid-fast, very-slow spring and winter  
 393 cultivars are very similar in the environments where this comparison was made, but  
 394 that the slower developing cultivars sown early have similar or higher yield  
 395 potential.  
 396

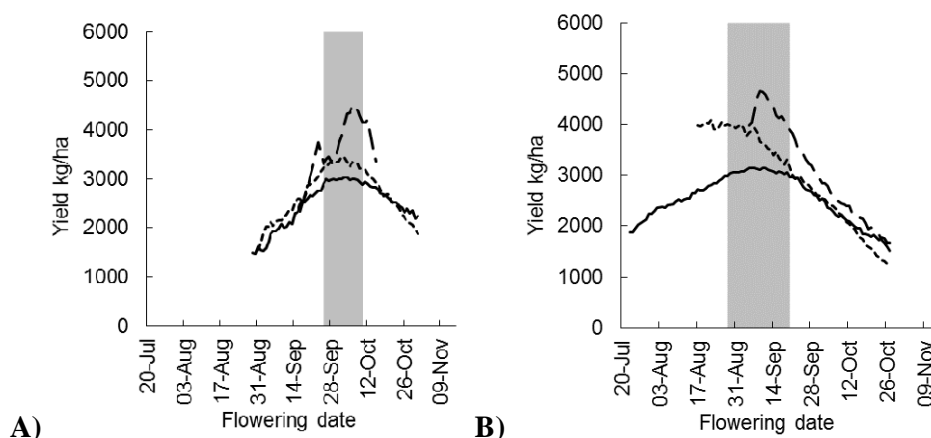

**Figure 6:** The 15-day running mean yield ( $\text{kg ha}^{-1}$ ) and flowering date of different wheat development types at A) Temora, NSW and B) Lameroo, SA over a 51-year simulation (1963-2013). Mean yields are for a mid-fast developing spring wheat (solid line), a very slow developing spring wheat (dotted line), and winter wheat (broken line). Grey columns are the estimated optimal flowering period defined as  $\geq 95\%$  of the maximum mean yield of a mid-fast cultivar.

**Table 4:** Simulated flowering date corresponding to peak mean frost and heat limited yield ( $\text{kg ha}^{-1}$ ) and sowing date for cultivars of different development type at Temora, NSW and Lameroo, SA.

| Maturity type    | Temora                             |                          |                                         | Lameroo                            |                          |                                         |
|------------------|------------------------------------|--------------------------|-----------------------------------------|------------------------------------|--------------------------|-----------------------------------------|
|                  | Peak mean yield ( $\text{kg/ha}$ ) | Flowering date peak mean | Sowing date corresponding to peak yield | Peak mean yield ( $\text{kg/ha}$ ) | Flowering date peak mean | Sowing date corresponding to peak yield |
| Winter           | 4514                               | 9-Oct                    | 12-Apr                                  | 4653                               | 9-Sep                    | 2-Apr                                   |
| Very slow spring | 3444                               | 2-Oct                    | 19-Apr                                  | 4086                               | 22-Aug                   | 22-Mar                                  |
| Mid fast spring  | 3038                               | 3-Oct                    | 14-May                                  | 3154                               | 7-Sep                    | 6-May                                   |

397

398

399

400 3. 4 Evidence of climate change

401 There is evidence that OFPs have shifted over the 51-year period considered in this  
402 study. At Lameroo the OFP for the years 1963-1997 was 4 to 19 September,  
403 Longerenong was 27 September to 2 October, and Charlton was 22 to 30 September.  
404 For the years 1998-2013 the OFP in Lameroo was 25 August to 8 September (Fig.  
405 7A), Longerenong 8 to 11 September (Fig. 7B), and in Charlton 1-4 September (Fig.  
406 7C). This can be attributed to lower than average rainfall and higher than average  
407 temperatures at flowering. Figure 8 illustrates climate change in Lameroo with a  
408 summary of September temperatures and growing season rainfall during the 51-year  
409 simulated time period.

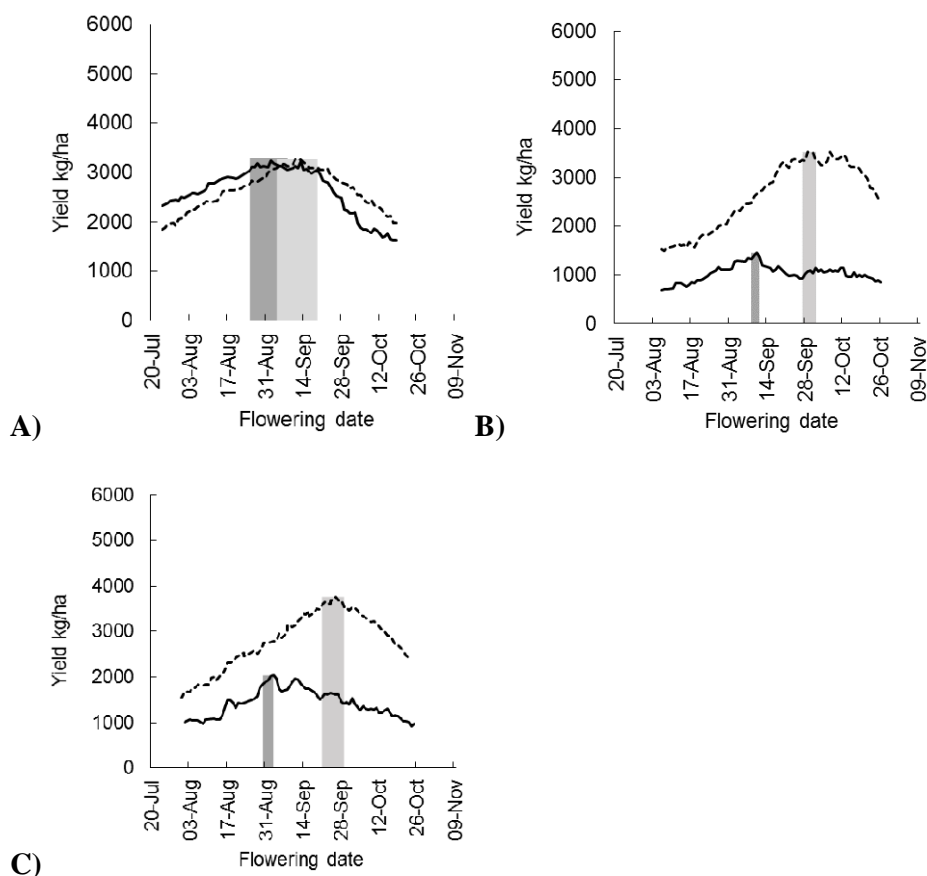

**Figure 7:** Estimated optimal flowering period (OFP) for mid-fast cultivar of wheat at A) Lameroo, SA and B) Longerenong, Vic C) Charlton, Vic for 35 years (1963-1997) (light grey column) and 16 years (dark grey column) (1998-2013). Mean frost and heat limited yield ( $\text{kg ha}^{-1}$ ) for 1963-1997 (broken line) and for 1998-2013 (solid line). Estimated OFP is defined by  $\geq 95\%$  of the maximum mean yield.



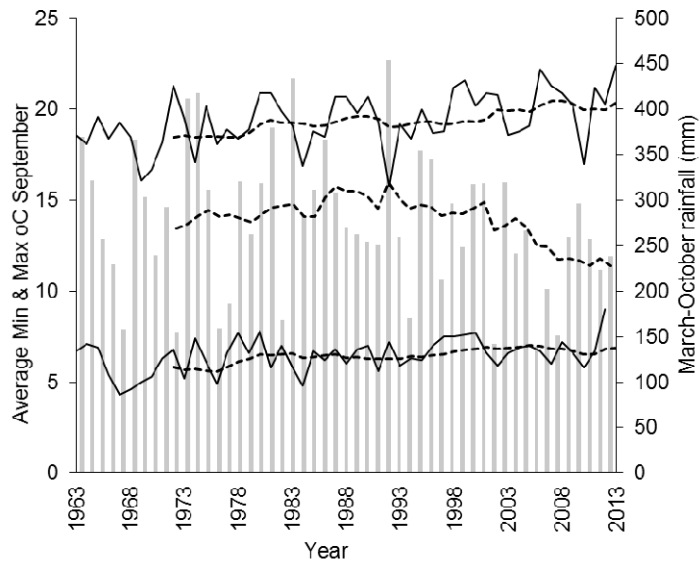

**Figure 8:** Growing season rainfall (columns) and average minimum and maximum temperature for September (solid lines) at Lameroo, SA. Broken lines are 10-year rolling means for rainfall and for minimum and maximum temperatures.

## 410 **4. Discussion**

### 411 *4.1 Variation in optimal flowering periods*

412 Variation in OFP duration indicated that defining OFP as 10 days either side of the  
413 optimum as proposed by Anderson *et al.* (1996) was not appropriate in all  
414 environments. Differences in the duration of OFPs were an indication of seasonal  
415 variability in a given environment, and the possible reasons causing the variability  
416 could be numerous. Wide OFPs may suggest that rainfall, frost and heat were more  
417 variable, as highest yields were achieved across a broader range of flowering dates  
418 e.g. Lameroo. Conversely wide OFP can also suggest a benign environment,  
419 resulting in a wide and stable environment for flowering e.g. Inverleigh. A narrower  
420 OFP suggests that an environment was less variable because optimal conditions for  
421 flowering occurred at approximately the same date in each season. Alternatively, a  
422 narrow period may indicate that the environment restricts the OFP due to overlap  
423 between the period of declining frost risk and the period of increasing drought and  
424 heat risk e.g. Hopetoun.

425 Zheng *et al.* (2012) also identified the OFP for two of the sites simulated here,  
426 Waikerie and Dubbo. At both sites the OFP in the Zheng *et al.* (2012) study were of  
427 a longer duration and later in the season than estimated here. While exact dates were  
428 not given in Zheng *et al.* (2012), for Waikerie the approximate OFP was the first  
429 week of September to mid- October, whereas by including water stress as a factor we  
430 found it to be much earlier and shorter from 23 August to 29 August. For Dubbo,  
431 Zheng *et al.* (2012) calculated the OFP from the last week of September to first week  
432 of November, while here it was 15 to 22 September. These differences in OFP reflect  
433 the methods used to calculate the OFP. Zheng *et al.* (2012) considered only the risk  
434 of heat and frost periods (i.e. temperature extremes) to define OFP, while here we  
435 also accounted for water stress and radiation effects on yield. This indicates that  
436 estimates of OFP defined only by extremes of temperature tend to be later in the  
437 season than when effects of drought are included.

438 In a two-year field study conducted by Gomez-Macpherson and Richards (1995), the  
439 optimal flowering date (determined by the highest yielding lines) for Condobolin  
440 was 10 September, and Penrose (1997) identified Temora's optimum date as 1  
441 October. In this study we found the OFP for Condobolin to be 11 to 19 September

442 with peak yield falling on 15 September, and the OFP for Temora to be from 25  
443 September to 10 October with peak yield falling on 3 October. In this comparison  
444 between experimental and our simulation method, the OFPs were very closely  
445 aligned, as in both cases optimal yield accounts for both temperature and water  
446 stress, rather than temperature extremes alone. However, our 51-year simulation  
447 study takes into account the long-term environmental patterns, providing a longer-  
448 term perspective.

#### 449 *4.2 Relative importance of temperature extremes (frost and heat) and water stress in* 450 *determining OFP*

451 Previous authors have defined OFPs by the occurrence of the last frost event and first  
452 heat event (Zheng *et al.*, 2012). We have shown that OFPs are actually defined by a  
453 trade-off between drought, radiation, frost and heat, rather than temperature as the  
454 primary factor (Fig. 5). Any crop flowering on the optimal date for yield in a given  
455 combination of site and season may experience all three abiotic stresses to varying  
456 degrees during their critical period. The OFP we have presented represents the  
457 period that minimises the combined yield reduction from all three stresses. To our  
458 knowledge, this is the first comprehensive study to identify OFP for wheat across  
459 south-eastern Australia that captures the impact of these stresses across a wide range  
460 of climate and soil-type variation. The approach would be applicable to other crops  
461 (e.g. barley, canola, grain legumes) where yield is also dependant on flowering in an  
462 optimal period.

#### 463 *4.3 Implications for sowing time and genotype*

464 Defining OFP is useful because it allows identification of appropriate sowing date x  
465 genotype combinations to optimise yield for a specific environment (Anderson *et al.*,  
466 1996). Timing of flowering in a given environment is a function of sowing date,  
467 genotype (cultivar) and prevailing seasonal temperatures. Sowing date and cultivar  
468 selection are two major management decisions made by wheat producers at the start  
469 of the growing season, the objective being to select combinations that lead to crops  
470 flowering during the OFP. Throughout the history of wheat cultivation, farmers and  
471 wheat breeders have selected developmental patterns which best match the  
472 conditions under which they are grown (Cockram *et al.*, 2007; Kamran *et al.*, 2014).  
473 Since the introduction of photoperiod insensitive semi-dwarf wheat cultivars during

474 the 1970s, breeding programs in SEA have focussed overwhelmingly on spring  
475 wheats of mid- to fast-maturity (Davidson *et al.*, 1985; Eagles *et al.*, 2009). The  
476 development pattern of these cultivars matched the timing of once reliable autumn  
477 planting rains in April-May with OFPs in spring. However, optimal sowing times for  
478 mid-fast cultivars (predominantly April-May, Table 3) which allow them to flower in  
479 the OFPs unfortunately coincides with the most severe period of recent rainfall  
480 decline identified by Cai *et al.* (2012) and Pook *et al.* (2009). New combinations of  
481 genotype x management will be required to ensure crops continue flowering in the  
482 OFPs. Strategies could include using stored soil water from either summer rainfall  
483 (Hunt *et al.*, 2013; Hunt and Kirkegaard, 2011; Verburg *et al.*, 2012), or long fallow  
484 (Oliver *et al.*, 2010) to establish crops. This practice has been shown to be successful  
485 in low rainfall locations in the Pacific Northwest of the USA (Schillinger and  
486 Young, 2014) and has previously been proposed for SEA by Kirkegaard and Hunt  
487 (2010). This practice would be facilitated by using genotypes with long coleoptiles  
488 which would allow them to emerge on stored soil water from greater soil depths  
489 (Rebetzke *et al.*, 2007). Another option would be to use winter wheat genotypes  
490 which can be established much earlier than spring genotypes when soil water is  
491 available, but still flower during the OFP as demonstrated by Penrose and Martin  
492 (1997). Establishment would then occur prior to the traditional sowing window, as  
493 late summer and early autumn rainfall has been more reliable in recent decades  
494 (Hunt and Kirkegaard, 2011). Previous simulation and field experiments have  
495 demonstrated that winter genotypes sown early yield as well as (Frischke *et al.*,  
496 2015; Gomez-Macpherson and Richards, 1995; Kirkegaard *et al.*, 2014) or better  
497 (Bell *et al.*, 2015; Coventry *et al.*, 1993; Moore, 2009) than spring genotypes sown  
498 later. Figure 6 and Table 4 support these findings. Now that OFP have been  
499 accurately defined, breeders and agronomist can use our definitions to target OFP in  
500 any given season, and depending how the season breaks, provide growers with new  
501 genotype x sowing strategies, such as listed above, for specific environments to  
502 maximise yield in a variable climate.

503 The sowing date ranges targeting OFP estimated in this study (Table 3) are  
504 consistently of shorter duration than those currently recommended by state  
505 departments of agriculture. For example, the recommended sowing date of mid-fast  
506 spring maturity types sown in the Victorian Mallee is between the last week of April,

507 and the second week of June (Department of Economic Development Jobs Transport  
508 and Resources and GRDC, 2015). According to our simulations, Kerang, situated in  
509 the Victorian Mallee has an optimal sowing date range of 25 April to 9 May, with a  
510 median sowing date of May 3. Similar conclusions can be reached at other sites in  
511 this analysis such as Longerenong in the Wimmera region of Victoria, Charlton in  
512 North Central Victoria and Yarrawonga in North Eastern Victoria, and also some  
513 sites in NSW (Matthews *et al.*, 2015). Whilst state recommendations appear to  
514 correctly estimate the start of the sowing period, they greatly overestimate the end of  
515 the optimal period. Currently no “sowing date guide” exists for South Australian  
516 farmers, but we believe trends to be similar there.

#### 517 *4.4 Climate change impacts on flowering and sowing dates*

518 Global minimum and maximum temperatures are increasing (IPCC, 2013). By 2030,  
519 Australian temperatures are predicted to rise between 1.9°C and 5°C (CSIRO and  
520 Bureau of Meteorology, 2015). Figure 7 shows that OFPs have shifted at three sites,  
521 Lameroo, Longerenong and Charlton over the 51-year period considered in this  
522 study. A shift to an earlier OFP can be expected in other areas of the SEA wheat-belt  
523 where autumn rainfall decline and increased spring drought has been experienced in  
524 the period 1998-2013. APSIM has been used to analyse crop development under  
525 future climates in numerous studies. Zheng *et al.* (2012) studied wheat development  
526 under future climate scenarios, and estimated that both sowing and flowering dates  
527 would occur earlier. Yang *et al.* (2014) also predicted through simulation that  
528 flowering will be 11 days earlier on average in the Australian wheat belt. This was  
529 explained by earlier last frost days and earlier first heat events in future climates.  
530 However, predictions of increased minimum temperatures and decline in frost  
531 incidence for SEA incorporated in the studies of Zheng *et al.* (2012) and Yang *et al.*  
532 (2014) are at odds with observed increases in the occurrence and severity of late-  
533 season frosts across the region (Crimp *et al.*, 2015). The Millennium drought (1996-  
534 2009) occurred within the 1998-2013 simulated time period, and was characterised  
535 by lower than average rainfall and higher temperatures (Fig. 8). Our study has  
536 demonstrated that in low rainfall sites and seasons, highest yields were achieved  
537 when the wheat crops flowered earlier, escaping spring drought (Fig. 2, 3, 5 and 7).  
538 This emphasizes the importance of considering patterns of water supply and demand  
539 when defining flowering periods rather than temperature extremes alone.

540 **5. Conclusion**

541 OFPs for wheat in SEA vary with site and season and are largely driven by seasonal  
542 water supply and demand, with extremes of heat and temperature having a secondary  
543 although auto-correlated effect. Sowing dates required for current cultivars to  
544 achieve OFPs coincide with a period of marked autumn rainfall decline which has  
545 reduced grain yields across the SEA region. Further work to identify new G x M  
546 strategies that target OFPs which account for water and temperature stress is  
547 required, to avoid current and future yield losses associated with autumn rainfall  
548 decline.

549 **Supplementary Data**

550 **Figure S1:** Optimal flowering period of wheat for 22 locations simulated and not  
551 displayed in Figure 4.

552 **Acknowledgements**

553 This research was funded by GRDC through the Grains Industry Research  
554 Scholarship and project number CSP00174.

## References

- Anderson W, Heinrich A, Abbotts R.** 1996. Long-season wheats extend sowing opportunities in the central wheat belt of Western Australia. *Australian Journal of Experimental Agriculture* **36**, 203-208.
- Anderson W, Smith W.** 1990. Yield advantage of two semi-dwarf compared with two tall wheats depends on sowing time. *Australian Journal of Agricultural Research* **41**, 811-826.
- Asseng S, Pannell DJ.** 2013. Adapting dryland agriculture to climate change: Farming implications and research and development needs in Western Australia. *Climatic Change* **118**, 167-181.
- Asseng S, Turner NC, Keating BA.** 2001. Analysis of water- and nitrogen-use efficiency of wheat in a Mediterranean climate. *Plant and Soil* **233**, 127-143.
- Barlow KM, Christy BP, O'Leary GJ, Riffkin PA, Nuttall JG.** 2015. Simulating the impact of extreme heat and frost events on wheat crop production: A review. *Field Crops Research* **171**, 109-119.
- Bell LW, Lilley JM, Hunt JR, Kirkegaard JA.** 2015. Optimising grain yield and grazing potential of crops across Australia's high-rainfall zone: a simulation analysis. 1. Wheat. *Crop & Pasture Science* **66**, 332-348.
- Bodner G, Nakhforoosh A, Kaul H-P.** 2015. Management of crop water under drought: a review. *Agronomy for Sustainable Development* **35**, 401-442.
- Boer R, Campbell LC, Fletcher DJ.** 1993. Characteristics of frost in a major wheat-growing region of Australia. *Australian Journal of Agricultural Research* **44**, 1731-1743.
- Cai W, Cowan T, Thatcher M.** 2012. Rainfall reductions over Southern Hemisphere semi-arid regions: the role of subtropical dry zone expansion. *Scientific Reports* **2**.
- Carberry PS, Hochman Z, Hunt JR, Dalgliesh NP, McCown RL, Whish JPM, Robertson MJ, Foale MA, Poulton PL, van Rees H.** 2009. Re-inventing model-based decision support with Australian dryland farmers. 3. Relevance of APSIM to commercial crops. *Crop & Pasture Science* **60**, 1044-1056.
- Chenu K, Dehifard R, Chapman SC.** 2013. Large-scale characterization of drought pattern: a continent-wide modelling approach applied to the Australian wheatbelt spatial and temporal trends. *New Phytologist* **198**, 801-820.
- Cockram J, Jones H, Leigh FJ, O'Sullivan D, Powell W, Laurie DA, Greenland AJ.** 2007. Control of flowering time in temperate cereals: genes, domestication, and sustainable productivity. *Journal of Experimental Botany* **58**, 1231-1244.
- Commonwealth of Australia.** 2013. Principal Agricultural Commodities, Australia, 2012-2013. Australian Bureau of Statistics, cat. no. 7111.0. Canberra.
- Coventry DR, Reeves TG, Brooke HD, Cann DK.** 1993. Influence of genotype, sowing date, and seeding rate on wheat development and yield. *Australian Journal of Experimental Agriculture* **33**, 751-757.
- Crimp S, Bakar KS, Kokic P, Jin HD, Nicholls N, Howden M.** 2015. Bayesian space-time model to analyse frost risk for agriculture in Southeast Australia. *International Journal of Climatology* **35**, 2092-2108.
- CSIRO, Bureau of Meteorology.** 2015. Climate Change in Australia Information for Australia's Natural Resource Management Regions. Technical Report. Australia.



- Dalgliesh NP, Foale MA, McCown RL.** 2009. Re-inventing model-based decision support with Australian dryland farmers. 2. Pragmatic provision of soil information for paddock-specific simulation and farmer decision making. *Crop & Pasture Science* **60**, 1031-1043.
- Davidson JL, Christian KR, Jones DB, Bremner PM.** 1985. Responses of wheat to vernalization and photoperiod. *Australian Journal of Agricultural Research* **36**, 347-359.
- del Moral LFG, Rharrabti Y, Villegas D, Royo C.** 2003. Evaluation of grain yield and its components in durum wheat under Mediterranean conditions: An ontogenic approach. *Agronomy Journal* **95**, 266-274.
- Department of Economic Development Jobs Transport and Resources, GRDC.** 2015. National Variety Trials. Victorian Winter Crop Summary 2015. , 1-84
- Eagles HA, Cane K, Vallance N.** 2009. The flow of alleles of important photoperiod and vernalisation genes through Australian wheat. *Crop & Pasture Science* **60**, 646-657.
- Ferris R, Ellis RH, Wheeler TR, Hadley P.** 1998. Effect of high temperature stress at anthesis on grain yield and biomass of field-grown crops of wheat. *Annals of Botany* **82**, 631-639.
- Fischer RA.** 1985. Number of kernels in wheat crops and the influence of solar-radiation and temperature. *Journal of Agricultural Science* **105**, 447-461.
- Frischke AJ, Hunt JR, McMillan DK, Browne CJ.** 2015. Forage and grain yield of grazed or defoliated spring and winter cereals in a winter-dominant, low-rainfall environment. *Crop & Pasture Science* **66**, 308-317.
- Fuller MP, Fuller AM, Kaniouras S, Christophers J, Fredericks T.** 2007. The freezing characteristics of wheat at ear emergence. *European Journal of Agronomy* **26**, 435-441.
- Giunta F, Motzo R, Deidda M.** 1993. Effect of drought on yield and yield components of durum-wheat and triticale in a mediterranean environment. *Field Crops Research* **33**, 399-409.
- Gomez-Macpherson H, Richards RA.** 1995. Effect of sowing time on yield and agronomic characteristics of wheat in south-eastern australia. *Australian Journal of Agricultural Research* **46**, 1381-1399.
- Hochman Z, Holzworth D, Hunt JR.** 2009. Potential to improve on-farm wheat yield and WUE in Australia. *Crop & Pasture Science* **60**, 708-716.
- Holzworth DP, Huth NI, Devoil PG, et al.** 2014. APSIM - Evolution towards a new generation of agricultural systems simulation. *Environmental Modelling & Software* **62**, 327-350.
- Hunt JR, Browne C, McBeath TM, Verburg K, Craig S, Whitbread AM.** 2013. Summer fallow weed control and residue management impacts on winter crop yield though soil water and N accumulation in a winter-dominant, low rainfall region of southern Australia. *Crop and Pasture Science* **64**, 922.
- Hunt JR, Kirkegaard JA.** 2011. Re-evaluating the contribution of summer fallow rain to wheat yield in southern Australia. *Crop & Pasture Science* **62**, 915-929.
- IPCC.** 2013. *Climate Change 2013: The Physical Science Basis. Contribution of Working Group I to the Fifth Assessment Report of the Intergovernmental Panel on Climate Change.* Cambridge, United Kingdom and New York, NY, USA: Cambridge University Press.



- Jeffrey SJ, Carter JO, Moodie KB, Beswick AR.** 2001. Using spatial interpolation to construct a comprehensive archive of Australian climate data. *Environmental Modelling & Software* **16**, 309-330.
- Kamran A, Iqbal M, Spaner D.** 2014. Flowering time in wheat (*Triticum aestivum* L.): a key factor for global adaptability. *Euphytica* **197**, 1-26.
- Keating BA, Carberry PS, Hammer GL, et al.** 2003. An overview of APSIM, a model designed for farming systems simulation. *European Journal of Agronomy* **18**, 267-288.
- Kirkegaard JA, Hunt JR.** 2010. Increasing productivity by matching farming system management and genotype in water-limited environments. *Journal of Experimental Botany* **61**, 4129-4143.
- Kirkegaard JA, Hunt JR, McBeath TM, Lilley JM, Moore A, Verburg K, Robertson M, Oliver Y, Ward PR, Milroy S, Whitbread AM.** 2014. Improving water productivity in the Australian Grains industry-a nationally coordinated approach. *Crop & Pasture Science* **65**, 583-601.
- Lilley J, Kirkegaard J, Robertson M, Probert M, Angus J, Howe G.** 2003. Simulating crop and soil processes in crop sequences in southern NSW. In 'Solutions for a Better Environment: 11th Australian Agronomy Conference'. 2-6 February 2003, Geelong (Eds M Unkovich, GJ O'Leary).
- Lilley JM, Kirkegaard JA.** 2007. Seasonal variation in the value of subsoil water to wheat: simulation studies in southern New South Wales. *Australian Journal of Agricultural Research* **58**, 1115-1128.
- Matthews P, McCaffery D, Jenkins L.** 2015. Winter crop variety sowing guide 2015. Department of Trade and Investment Regional Infrastructure and Services: NSW Department of Primary Industries.
- Moore AD.** 2009. Opportunities and trade-offs in dual-purpose cereals across the southern Australian mixed-farming zone: a modelling study. *Animal Production Science* **49**, 759-768.
- Murphy BF, Timbal B.** 2008. A review of recent climate variability and climate change in southeastern Australia. *International Journal of Climatology* **28**, 859-879.
- Oliver YM, Robertson MJ, Weeks C.** 2010. A new look at an old practice: Benefits from soil water accumulation in long fallows under Mediterranean conditions. *Agricultural Water Management* **98**, 291-300.
- Penrose LDJ.** 1997. Prediction of ear emergence in winter wheats grown at Temora, New South Wales. *Australian Journal of Agricultural Research* **48**, 433-445.
- Penrose LDJ, Martin RH.** 1997. Comparison of winter habit and photoperiod sensitivity in delaying development in early-sown wheat at a site in New South Wales. *Australian Journal of Experimental Agriculture* **37**, 181-190.
- Pook M, Lisson S, Risbey J, Ummenhofer CC, McIntosh P, Rebbeck M.** 2009. The autumn break for cropping in southeast Australia: trends, synoptic influences and impacts on wheat yield. *International Journal of Climatology* **29**, 2012-2026.
- Potgieter AB, Hammer GL, Butler D.** 2002. Spatial and temporal patterns in Australian wheat yield and their relationship with ENSO. *Australian Journal of Agricultural Research* **53**, 77-89.
- Randall PJ, Moss HJ.** 1990. Some effects of temperature regime during grain filling on wheat quality. *Australian Journal of Agricultural Research* **41**, 603-617.

- Rebetzke GJ, Ellis MH, Bonnett DG, Richards RA.** 2007. Molecular mapping of genes for coleoptile growth in bread wheat (*Triticum aestivum* L.). *Theoretical and Applied Genetics* **114**, 1173-1183.
- Richards RA.** 1991. Crop improvement for temperate Australia: Future opportunities. *Field Crops Research* **26**, 141-169.
- Richards RA, Hunt JR, Kirkegaard JA, Passioura JB.** 2014. Yield improvement and adaptation of wheat to water-limited environments in Australia-a case study. *Crop & Pasture Science* **65**, 676-689.
- Ritchie JT, NeSmith DS.** 1991. Temperature and Crop Development. In: Hanks J, J. T. Ritchie., eds. *Modeling plant and soil systems Agronomy* 31, 5-29.
- Schillinger WF, Young DL.** 2014. Best Management Practices for Summer Fallow in the World's Driest Rainfed Wheat Region. *Soil Science Society of America Journal* **78**, 1707.
- Shpiler L, Blum A.** 1990. Heat tolerance for yield and its components in different wheat cultivars *Euphytica* **51**, 257-263.
- Stone PJ, Nicolas ME.** 1995. Effect of timing of heat stress during grain filling on two wheat varieties differing in heat tolerance. 1. Grain growth. *Australian Journal of Plant Physiology* **22**, 927-934.
- Tashiro T, Wardlaw IF.** 1990. The response to high-temperature shock and humidity changes prior to and during the early stages of grain development in wheat. *Australian Journal of Plant Physiology* **17**, 551-561.
- Turner NC.** 2004. Agronomic options for improving rainfall-use efficiency of crops in dryland farming systems. *Journal of Experimental Botany* **55**, 2413-2425.
- Verburg K, Bond WJ, Hunt JR.** 2012. Fallow management in dryland agriculture: Explaining soil water accumulation using a pulse paradigm. *Field Crops Research* **130**, 68-79.
- Verdon-Kidd DC, Kiem AS, Moran R.** 2014. Links between the Big Dry in Australia and hemispheric multi-decadal climate variability - implications for water resource management. *Hydrology and Earth System Sciences* **18**, 2235-2256.
- Yang YM, Liu DL, Anwar MR, Zuo HP, Yang YH.** 2014. Impact of future climate change on wheat production in relation to plant-available water capacity in a semiarid environment. *Theoretical and Applied Climatology* **115**, 391-410.
- Zheng BY, Biddulph B, Li DR, Kuchel H, Chapman S.** 2013. Quantification of the effects of VRN1 and Ppd-D1 to predict spring wheat (*Triticum aestivum*) heading time across diverse environments. *Journal of Experimental Botany* **64**, 3747-3761.
- Zheng BY, Chapman SC, Christopher JT, Frederiks TM, Chenu K.** 2015. Frost trends and their estimated impact on yield in the Australian wheatbelt. *Journal of Experimental Botany* **66**, 3611-3623.
- Zheng BY, Chenu K, Dreccer MF, Chapman SC.** 2012. Breeding for the future: what are the potential impacts of future frost and heat events on sowing and flowering time requirements for Australian bread wheat (*Triticum aestivum*) varieties? *Global Change Biology* **18**, 2899-2914.
